# Supplementary material
Source: MDPI journal article supplement (https://www.mdpi.com/2313-0105/9/12/567)
Supplement: s1 [file s1]

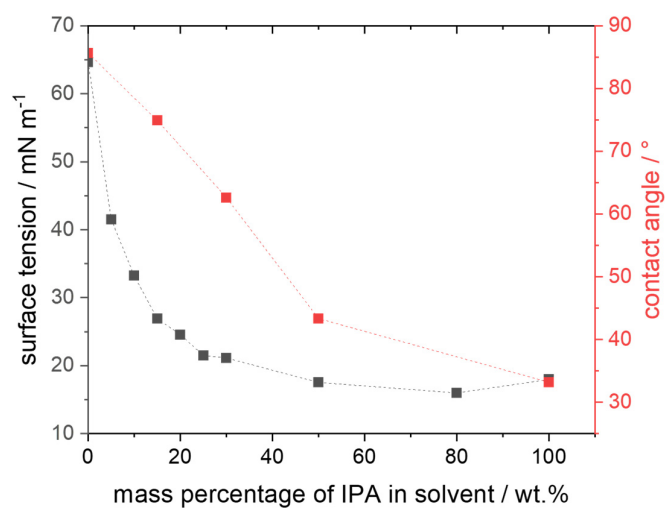

**Figure S1.** Surface tension of solvent and contact angle towards LFP of solvent in dependency of the mass percentage of IPA within the solvent.

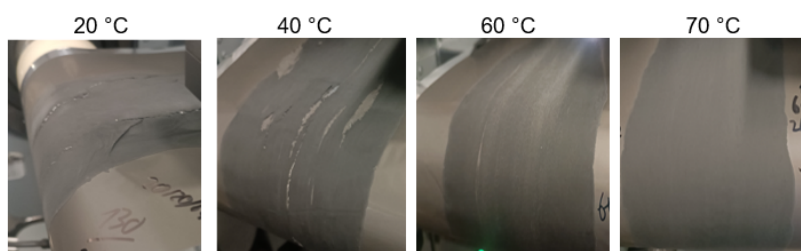

**Figure S2.** Cathode surface in dependence on the coating application temperature.

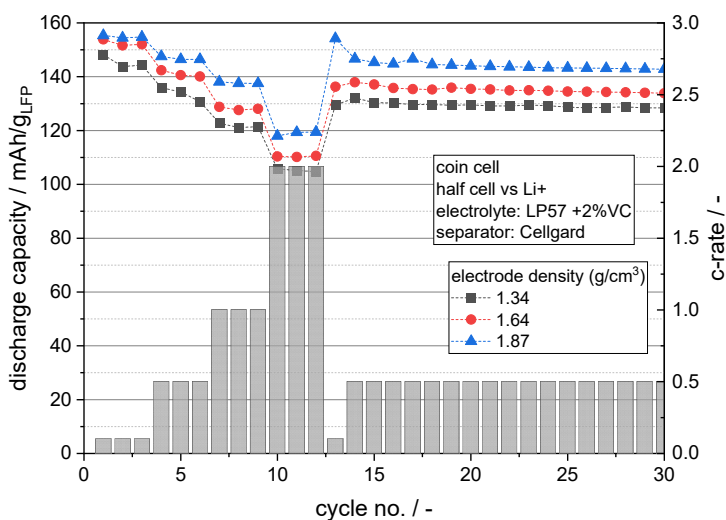

**Figure S3.** Discharge capacity of conf.1 in dependency of the electrode density.

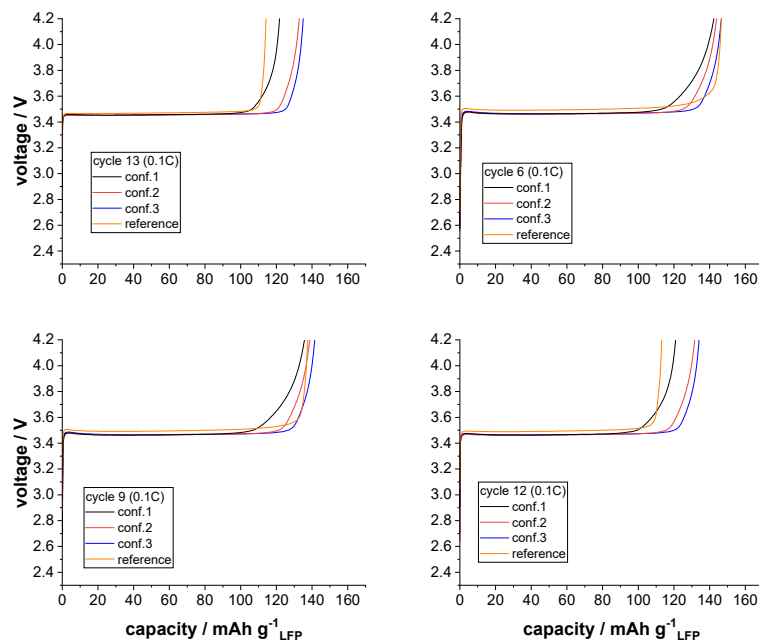

**Figure S4.** Voltage over capacity plots for the different cycle no.at a constant charge rate of 0.1C in dependency of processing strategies.

The charge rate was held constant at 0.1 in each case. For the reference, a slight overpotential is observed during the charging process. Furthermore, notably for cycles 13 and 12, reduced charging capacities are observed. This is attributed to the prior discharge at high C-rates (2C), resulting in incomplete cell discharge. Consequently, the cells require less charging capacity in subsequent cycles.

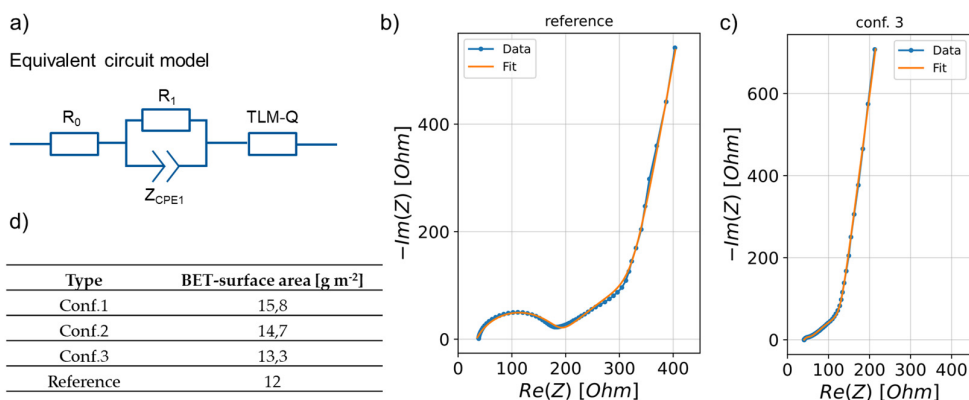

**Figure S5.** Equivalent circuit model used for EIS measurement fitting (a) as well as impedance spectrum and fit for reference (b) and conf. 3 cell (c) as well as BET surface area (d).
